# Supplementary material
Source: PubMed Central journal article supplement (PMC8013129)
Supplement: 2434_tables.pdf [file 2434_tables.pdf]

**On-line Table 1: ADCs of sinonasal tumors and tumorlike lesions**

|                                         | No. | Overall ADC<br>( $\times 10^{-3}$ mm <sup>2</sup> /s) | ADC Mapping (%) |             |              |             |
|-----------------------------------------|-----|-------------------------------------------------------|-----------------|-------------|--------------|-------------|
|                                         |     |                                                       | Extremely Low   | Low         | Intermediate | High        |
| Inflammatory lesions                    | 14  | 1.50 $\pm$ 0.50                                       | 14 $\pm$ 21     | 18 $\pm$ 12 | 32 $\pm$ 16  | 36 $\pm$ 27 |
| Sinusitis                               | 5   | 1.86 $\pm$ 0.41                                       | 5 $\pm$ 6       | 11 $\pm$ 14 | 24 $\pm$ 11  | 60 $\pm$ 28 |
| Inflammatory polyp                      | 5   | 1.55 $\pm$ 0.18                                       | 6 $\pm$ 9       | 16 $\pm$ 8  | 46 $\pm$ 10  | 32 $\pm$ 8  |
| Fungus infection                        | 4   | 0.98 $\pm$ 0.47                                       | 35 $\pm$ 30     | 28 $\pm$ 5  | 26 $\pm$ 20  | 11 $\pm$ 13 |
| Benign lesions                          | 19  | 1.35 $\pm$ 0.29                                       | 8 $\pm$ 11      | 28 $\pm$ 18 | 48 $\pm$ 18  | 16 $\pm$ 14 |
| Angiofibroma                            | 3   | 1.59 $\pm$ 0.11                                       | 3 $\pm$ 4       | 14 $\pm$ 11 | 55 $\pm$ 14  | 28 $\pm$ 2  |
| Inverted papilloma                      | 7   | 1.52 $\pm$ 0.14                                       | 1 $\pm$ 1       | 18 $\pm$ 9  | 60 $\pm$ 5   | 21 $\pm$ 12 |
| Hemangioma                              | 4   | 1.29 $\pm$ 0.35                                       | 7 $\pm$ 11      | 32 $\pm$ 23 | 48 $\pm$ 19  | 13 $\pm$ 22 |
| Organized hematoma                      | 5   | 1.01 $\pm$ 0.14                                       | 22 $\pm$ 6      | 46 $\pm$ 10 | 25 $\pm$ 10  | 7 $\pm$ 6   |
| Malignant tumors                        | 28  | 0.87 $\pm$ 0.32                                       | 30 $\pm$ 29     | 53 $\pm$ 25 | 13 $\pm$ 15  | 4 $\pm$ 11  |
| SCC <sup>a</sup>                        | 13  | 0.81 $\pm$ 0.12                                       | 21 $\pm$ 18     | 70 $\pm$ 17 | 8 $\pm$ 6    | 1 $\pm$ 1   |
| SRBCTs                                  | 11  | 0.78 $\pm$ 0.41                                       | 49 $\pm$ 33     | 35 $\pm$ 22 | 10 $\pm$ 13  | 5 $\pm$ 16  |
| Malignant lymphoma                      | 6   | 0.56 $\pm$ 0.09                                       | 72 $\pm$ 15     | 27 $\pm$ 14 | 1 $\pm$ 1    | 0 $\pm$ 1   |
| UDCs                                    | 2   | 0.66 $\pm$ 0.05                                       | 52 $\pm$ 10     | 40 $\pm$ 7  | 7 $\pm$ 4    | 1 $\pm$ 1   |
| Other SRBCTs <sup>b</sup>               | 3   | 1.29 $\pm$ 0.50                                       | 3 $\pm$ 2       | 49 $\pm$ 36 | 30 $\pm$ 7   | 18 $\pm$ 31 |
| Miscellaneous malignancies <sup>c</sup> | 4   | 1.29 $\pm$ 0.14                                       | 4 $\pm$ 2       | 43 $\pm$ 17 | 40 $\pm$ 6   | 13 $\pm$ 11 |

<sup>a</sup> SCCs included poorly differentiated, moderately differentiated, well-differentiated, and nonkeratinizing SCCs and spindle-cell tumors.

<sup>b</sup> Olfactory neuroblastoma, pleomorphic rhabdomyosarcoma, and malignant melanoma.

<sup>c</sup> Metastatic renal cell carcinoma, metastatic adenocarcinoma, and adenoid cystic carcinoma.

**On-line Table 2: ADCs of sinonasal tumors and tumorlike lesions**

|                                                        | Overall ADC         | P Values <sup>a</sup> |                     |                     |
|--------------------------------------------------------|---------------------|-----------------------|---------------------|---------------------|
|                                                        |                     | ADC Mapping           |                     |                     |
|                                                        |                     | Extremely Low         | Low                 | Extremely Low + Low |
| Inflammation vs benign                                 | .2588               | .4775                 | .1090               | .5723               |
| Inflammation vs malignant                              | .0002 <sup>a</sup>  | .0387 <sup>a</sup>    | <.0001 <sup>a</sup> | <.0001 <sup>a</sup> |
| Benign vs malignant                                    | <.0001 <sup>a</sup> | .0007 <sup>a</sup>    | .0010 <sup>a</sup>  | <.0001 <sup>a</sup> |
| Lymphoma vs SCC                                        | .0016 <sup>a</sup>  | .0009 <sup>a</sup>    | .0012 <sup>a</sup>  | .0065 <sup>a</sup>  |
| Lymphoma vs SCC + UDC                                  | .0014 <sup>a</sup>  | .0011 <sup>a</sup>    | .0014 <sup>a</sup>  | .0039 <sup>a</sup>  |
| SCC + UDC vs Other SRBCTs + miscellaneous malignancies | .0004 <sup>a</sup>  | .0004 <sup>a</sup>    | .0375 <sup>a</sup>  | .0004 <sup>a</sup>  |
| Fungus vs other inflammation                           | .0109 <sup>a</sup>  | .0339 <sup>a</sup>    | .0771               | .0237 <sup>a</sup>  |
| Hematoma vs other benign                               | .0041 <sup>a</sup>  | .0030 <sup>a</sup>    | .0095 <sup>a</sup>  | .0055 <sup>a</sup>  |
| Fungus vs hematoma                                     | .8065               | .8065                 | .0143 <sup>a</sup>  | .8065               |
| Fungus + hematoma vs other benign + inflammation       | .0001 <sup>a</sup>  | .0001 <sup>a</sup>    | .0019 <sup>a</sup>  | .0002 <sup>a</sup>  |
| Fungus + hematoma vs malignant                         | .1152               | .6202                 | .0962               | .0246 <sup>a</sup>  |
| Fungus + hematoma vs lymphoma                          | .0133 <sup>a</sup>  | .0047 <sup>a</sup>    | .0875               | .0027 <sup>a</sup>  |
| Fungus + hematoma vs SCC + UDC                         | .0171 <sup>a</sup>  | .6547                 | .0019 <sup>a</sup>  | .0019 <sup>a</sup>  |

<sup>a</sup> Mann-Whitney *U* test; statistically significant differences ( $P < .05$ ).
